# Supplementary material for: Factors Influencing Successful Prescribing by Intern Doctors: A Qualitative Systematic Review
Source: MDPI journal article supplement (doi:10.3390/pharmacy4030024), 2016-08-24
Supplement: s1 [file s1]

# Supplementary Materials: Factors Influencing Successful Prescribing by Intern Doctors: A Qualitative Systematic Review

Christina R. Hansen, Colin P. Bradley and Laura J. Sahm

## Search Protocol

### Search Strategy

#### Title

Experiences of intern doctors in prescribing patients at hospital discharge: a systematic review of the qualitative literature.

#### Background and Issue

The purpose of the literature review is to describe the experiences of intern doctors on prescribing for hospital discharge, specifically focusing on inappropriate prescribing behaviour and errors related to clinical pharmacology and therapeutics.

#### Question of Focus

How do intern doctors view and experience the prescribing task upon hospital discharge?

#### Eligibility Criteria

**Table S1.** The PICO model [1].

|                     |                                                                                             |
|---------------------|---------------------------------------------------------------------------------------------|
| <b>Population</b>   | Intern doctors                                                                              |
| <b>Intervention</b> | Inappropriate prescribing behaviour among intern doctors at the point of hospital discharge |
| <b>Comparison</b>   | Appropriate prescribing behaviour                                                           |
| <b>Outcome</b>      | Factors influencing prescribing behaviour among intern doctors                              |
| <b>Keywords</b>     | Intern doctor, prescribing, error, hospital, discharge                                      |

**Table S2.** Inclusion and exclusion criteria.

| Inclusion criteria         | Exclusion Criteria                                                                            |
|----------------------------|-----------------------------------------------------------------------------------------------|
| Semi-structured interviews | Surveys and questionnaires                                                                    |
| In-depth interviews        | Observational studies                                                                         |
| Original primary research  | Abstracts where full text is not available or not available in English                        |
| Published in English       | Literature reviews, meta-analysis, commentaries, editorials, conference material and posters. |

**Table S3.** Information resources searched.

| Information Resources                          |
|------------------------------------------------|
| PubMed                                         |
| EMBASE                                         |
| CINAHL                                         |
| Cochrane Central Register of Controlled Trials |
| Google Scholar                                 |
| PsycINFO                                       |
| Web of Science                                 |

## Results of the literature search

Date: 30 February 2016.

**Table S4.** Search terms and strategy.

| Search Term Number                                                                                                                              | Synonyms                       | Truncations        |
|-------------------------------------------------------------------------------------------------------------------------------------------------|--------------------------------|--------------------|
| 1                                                                                                                                               | Intern doctor                  | Intern doctor *    |
|                                                                                                                                                 | Intern                         | -                  |
|                                                                                                                                                 | Junior doctor                  | Junior doctor *    |
|                                                                                                                                                 | Junior physician               | Junior physician * |
|                                                                                                                                                 | Foundation Year                | -                  |
|                                                                                                                                                 | Medical Student                | Medical Student *  |
|                                                                                                                                                 | House Officer                  | House officer *    |
|                                                                                                                                                 | Trainee                        | Trainee *          |
| 2                                                                                                                                               | Medication errors <sup>a</sup> | -                  |
|                                                                                                                                                 | Prescribing                    | -                  |
| <b>Combination of Search Terms</b>                                                                                                              |                                |                    |
| 1: Intern doctor * or Intern * or Junior doctor * or Junior physician * or Foundation Year or Medical Student * or House officer * or Trainee * |                                |                    |
| 2: Medication errors or Prescribing                                                                                                             |                                |                    |
| 1 and 2                                                                                                                                         |                                |                    |

<sup>a</sup> “Medication error” is a MeSH term and truncation is not applied to this search term. Truncation prevents searching of MeSH terms. Instead, the plural form “medication errors” is searched, as it will cover search of “medication errors” as a MeSH term and the plural and the singular form of “medication errors”.

**Table S5.** Full literature search of all information resources.

| Database                  | Search Strategy        | Search                                                                                                                                                                                                                                                                                                           | Result |
|---------------------------|------------------------|------------------------------------------------------------------------------------------------------------------------------------------------------------------------------------------------------------------------------------------------------------------------------------------------------------------|--------|
| PubMed                    | Combination<br>1 and 2 | “intern doctor” or “intern doctors” or intern or interns or “junior doctor” or “junior doctors” or “junior physician” or “junior physicians” or “foundation year” or “medical student” or “medical students” or “house officer” or “house officers” or trainee or trainees and “medication error” or prescribing | 1279   |
| EMBASE                    | Combination<br>1 and 2 | “intern doctor” or “intern doctors” or intern or interns or “junior doctor” or “junior doctors” or “junior physician” or “junior physicians” or “foundation year” or “medical student” or “medical students” or “house officer” or “house officers” or trainee or trainees and “medication error” or prescribing | 2136   |
| CINAHL                    | Combination<br>1 and 2 | (“intern doctor*” or intern or interns or “junior doctor*” or “junior physician*” or “foundation year” or “medical student*” or “house officer*” or trainee*) and (“medication error” or prescribing)                                                                                                            | 265    |
| Cochrane Library (Trials) | Combination<br>1 and 2 | (“intern doctor*” or intern* or “junior doctor*” or “junior physician*” or “foundation year*” or “medical student*” or “house officer*” or trainee*) and (“medication error” or prescribing)                                                                                                                     | 42     |
| PsycINFO                  | Combination<br>1 and 2 | “intern doctor” or intern or “junior doctor” or “junior physician” or “foundation year” or “medical student” or “house officer” or trainee and “medication error” or prescribing                                                                                                                                 | 153    |
| Web of Science            | Combination<br>1 and 2 | (“intern doctor*” or intern or interns or “junior doctor*” or “junior physician*” or “foundation year” or “medical student*” or “house officer*” or trainee*) and (“medication error” or prescribing)                                                                                                            | 1105   |
| Google Scholar            | Combination<br>1 and 2 | (intern doctor or intern doctors or intern or interns or junior doctor or junior doctors or junior physician or junior physicians or foundation year or medical student or medical students or house ) and (medication error or medication errors or prescribing)                                                | 55     |
| Total                     |                        |                                                                                                                                                                                                                                                                                                                  | 5035   |

## Study Selection

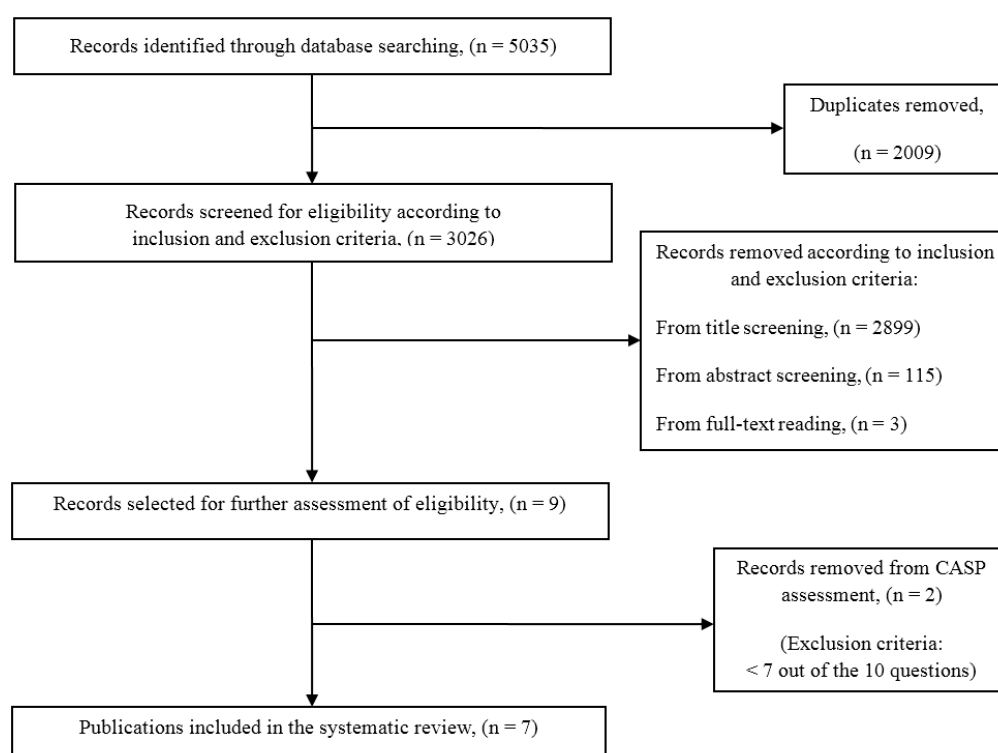

**Figure S1.** Flow diagram of the study selection for inclusion in a systematic review of the qualitative literature of the qualitative literature of the experiences of intern doctors in prescribing patients for hospital discharge.

## List of Publications Included in the Systematic Literature Review.

- Coombes, I.D.; Stowasser, D.A.; Coombes, J.A.; Mitchell, C. Why do interns make prescribing errors? A qualitative study. *Med. J. Aust.* **2008**, *188*, 89–94.
- Dean, B.; Schachter, M.; Vincent, C.; Barber, N. Causes of prescribing errors in hospital inpatients: A prospective study. *Lancet* **2002**, *359*, 1373–1378.
- Duncan, E.M.; Francis, J.J.; Johnston, M.; Davey, P.; Maxwell, S.; McKay, G.A.; McLay, J.; Ross, S.; Ryan, C.; Webb, D.J.; et al. Learning curves, taking instructions, and patient safety: Using a theoretical domains framework in an interview study to investigate prescribing errors among trainee doctors. *Implement. Sci.* **2012**, *7*, 86.
- Gordon, M.; Catchpole, K.; Baker, P. Human factors perspective on the prescribing behavior of recent medical graduates: Implications for educators. *Adv. Med. Educ. Pract.* **2013**, *4*, 1–9.
- Lewis, P.J.; Ashcroft, D.M.; Dornan, T.; Taylor, D.; Wass, V.; Tully, M.P. Exploring the causes of junior doctors' prescribing mistakes: A qualitative study. *Br. J. Clin. Pharmacol.* **2014**, *78*, 310–319.
- Pearson, S.; Rolfe, I.; Smith, T. Factors influencing prescribing: An intern's perspective. *Med. Educ.* **2002**, *36*, 781–787.
- Ross, S.; Ryan, C.; Duncan, E.M.; Francis, J.J.; Johnston, M.; Ker, J.S.; Lee, A.J.; MacLeod, M.J.; Maxwell, S.; McKay, G.; et al. Perceived causes of prescribing errors by junior doctors in hospital inpatients: A study from the protect programme. *BMJ Qual. Saf.* **2013**, *22*, 97–102.

## References

- Asking Focused Questions. Centre For Evidence-Based Medicine. Available online: <http://www.cebm.net/asking-focused-questions/> (accessed on 19 August 2016).
- Critical Appraisal Skills Programme (CASP); UK, 2013. Available online: <http://www.casp-uk.net/#!casp-tools-checklists/c18f8> (accessed on 19 August 2016).
